# Supplementary material for: Efficient violet-light-excitable blue-cyan phosphor for full-spectrum lighting
Source: Royal Society of Chemistry journal article supplement (doi:10.1039/d2qi01552h), 2022-01-01
Supplement: d2qi01552h1.pdf [file d2qi01552h1.pdf]

## Supporting Information

### Efficient violet-light-excitable blue-cyan phosphor for full-spectrum lighting

Yuhe Shao, Hao Cai, Fangyi Zhao, Shengqiang Liu, Zhen Song,\* and Quanlin Liu\*

The Beijing Municipal Key Laboratory of New Energy Materials and Technologies, School of Materials Sciences and Engineering, University of Science and Technology Beijing, Beijing 100083, China. E-mail: [zsong@ustb.edu.cn](mailto:zsong@ustb.edu.cn), [qlliu@ustb.edu.cn](mailto:qlliu@ustb.edu.cn)

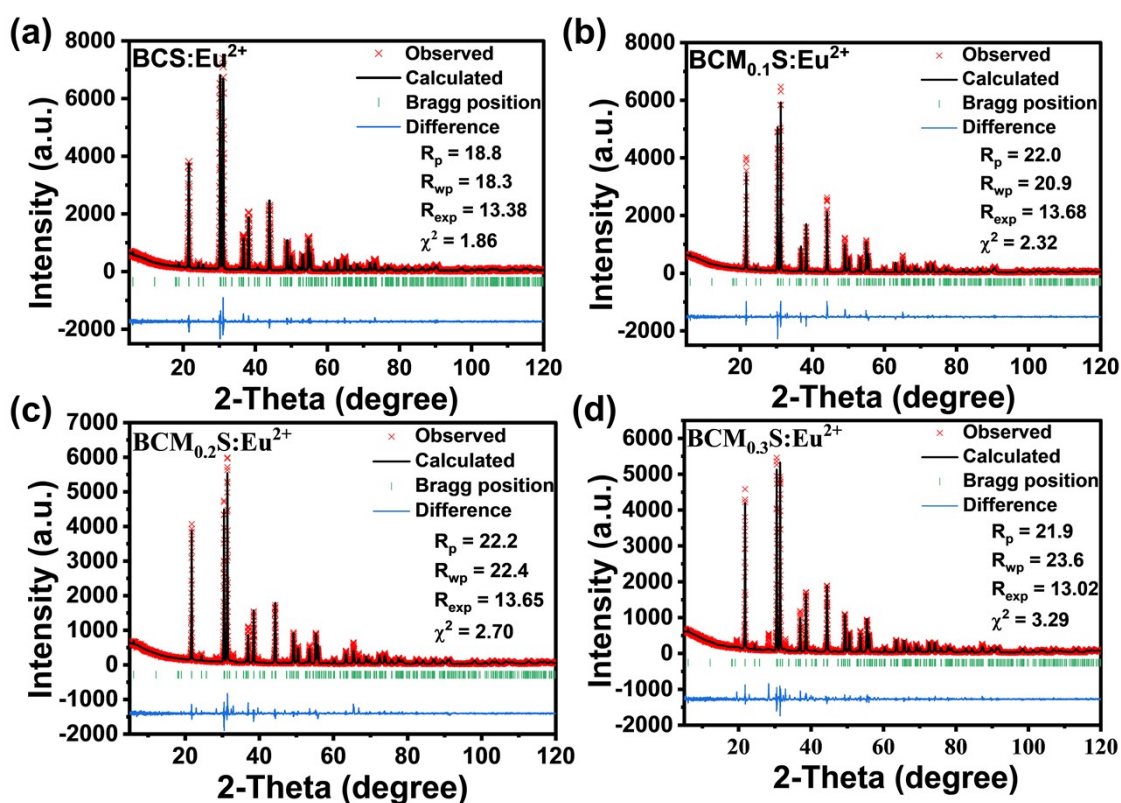

Figure S1. The Rietveld refinement of  $\text{BCM}_x\text{S}:\text{Eu}^{2+}$  ( $x = 0, 0.1, 0.2$  and  $0.3$ ) samples.

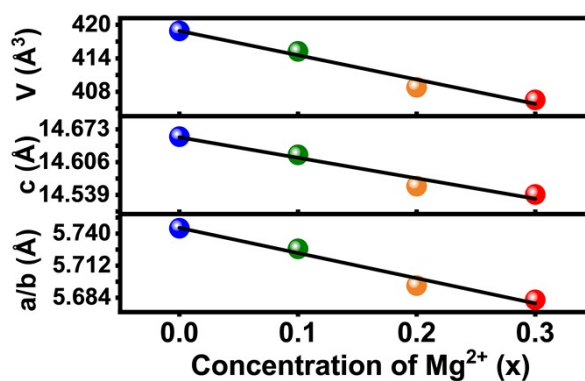

Figure S2. Dependence of cell parameters ( $a/b$  and  $c$ ) and unit cell volume ( $V$ ) on the concentration of  $\text{Mg}^{2+}$ .

**Table S1.** The refined atomic coordinates and chemistry occupancies of BCS sample\*

| Atoms | Wyckoff position | x         | y         | z         | Occ       |
|-------|------------------|-----------|-----------|-----------|-----------|
| Ba1   | 6i               | 0.6597(7) | 0.6597(7) | 0.1590(1) | 0.2217(0) |
| Ca1   | 6i               | 0.6597(7) | 0.6597(7) | 0.1590(1) | 0.1116(3) |
| Ba2   | 6g               | 0.0894(4) | 0.00000   | 0.00000   | 0.1433(6) |
| Ca2   | 6g               | 0.0894(4) | 0.00000   | 0.00000   | 0.0233(1) |
| Ba3   | 2d               | 0.33330   | 0.66670   | 0.3429(5) | 0.9918(0) |
| Ca3   | 2d               | 0.33330   | 0.66670   | 0.3429(5) | 0.0082(0) |
| Ba4   | 2c               | 0.0000    | 0.00000   | 0.2387(4) | 0.0368(9) |
| Ca4   | 2c               | 0.0000    | 0.00000   | 0.2387(4) | 0.9631(1) |
| Ba5   | 1b               | 0.00000   | 0.00000   | 0.50000   | 1         |
| Si1   | 2d               | 0.33330   | 0.66670   | 0.1175(3) | 1         |
| Si2   | 2d               | 0.33330   | 0.66670   | 0.6096(8) | 1         |
| O1    | 12j              | 0.1450(0) | 0.3600(0) | 0.1595(0) | 0.5       |
| O2    | 6i               | 0.7150(0) | 0.7150(0) | 0.4960(0) | 0.3333(3) |
| O3    | 6i               | 0.8120(0) | 0.8120(0) | 0.3360(0) | 0.5       |
| O4    | 6i               | 0.8280(0) | 0.8280(0) | 0.3700(0) | 0.5       |
| O5    | 2d               | 0.33330   | 0.66670   | 0.0060(0) | 1         |

\*In the split-atom-site model of T-phase, the atom occupancies of M1, M2, O1, O2, O3 and O4 are 1/3, 1/6, 1/2, 1/3, 1/2 and 1/2, respectively.

**Table S2.** The refined atomic coordinates and chemistry occupancies of BCM<sub>0.3</sub>S sample\*

| Atoms | Wyckoff position | x         | y         | z         | Occ       |
|-------|------------------|-----------|-----------|-----------|-----------|
| Ba1   | 6i               | 0.6645(5) | 0.6645(5) | 0.1619(6) | 0.2361(3) |
| Ca1   | 6i               | 0.6645(5) | 0.6645(5) | 0.1619(6) | 0.0972(0) |
| Ba2   | 6g               | 0.0759(6) | 0.00000   | 0.00000   | 0.1432(5) |
| Ca2   | 6g               | 0.0759(6) | 0.00000   | 0.00000   | 0.0234(2) |
| Ba3   | 2d               | 0.33330   | 0.66670   | 0.3409(0) | 0.9917(2) |
| Ca3   | 2d               | 0.33330   | 0.66670   | 0.3409(0) | 0.0082(8) |
| Ba4   | 2c               | 0.00000   | 0.00000   | 0.2472(1) | 0.0234(5) |
| Ca4   | 2c               | 0.00000   | 0.00000   | 0.2472(1) | 0.0415(6) |
| Mg1   | 2c               | 0.00000   | 0.00000   | 0.2472(1) | 0.9349(9) |
| Ba5   | 1b               | 0.00000   | 0.00000   | 0.50000   | 1         |
| Si1   | 2d               | 0.33330   | 0.66670   | 0.1152(8) | 1         |
| Si2   | 2d               | 0.33330   | 0.66670   | 0.6125(2) | 1         |
| O1    | 12j              | 0.1516(4) | 0.3553(7) | 0.1573(0) | 0.5       |
| O2    | 6i               | 0.7183(7) | 0.7183(7) | 0.4980(1) | 0.3333(3) |
| O3    | 6i               | 0.7965(0) | 0.7965(0) | 0.3305(9) | 0.5       |
| O4    | 6i               | 0.8149(3) | 0.8149(3) | 0.3778(1) | 0.5       |
| O5    | 2d               | 0.33330   | 0.66670   | 0.0001(2) | 1         |

\*In the split-atom-site model of T-phase, the atom occupancies of M1, M2, O1, O2, O3 and O4 are 1/3, 1/6, 1/2, 1/3, 1/2 and 1/2, respectively.

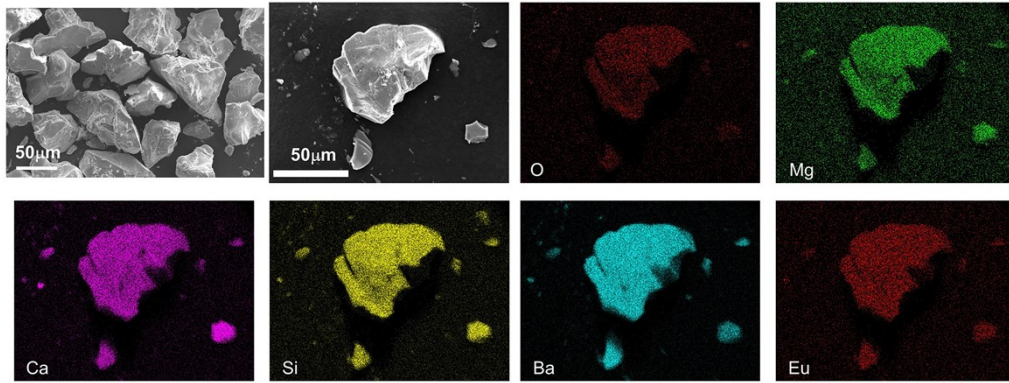

**Figure S3.** The SEM image and elemental mapping images of BCM<sub>0.3</sub>S:Eu<sup>2+</sup>

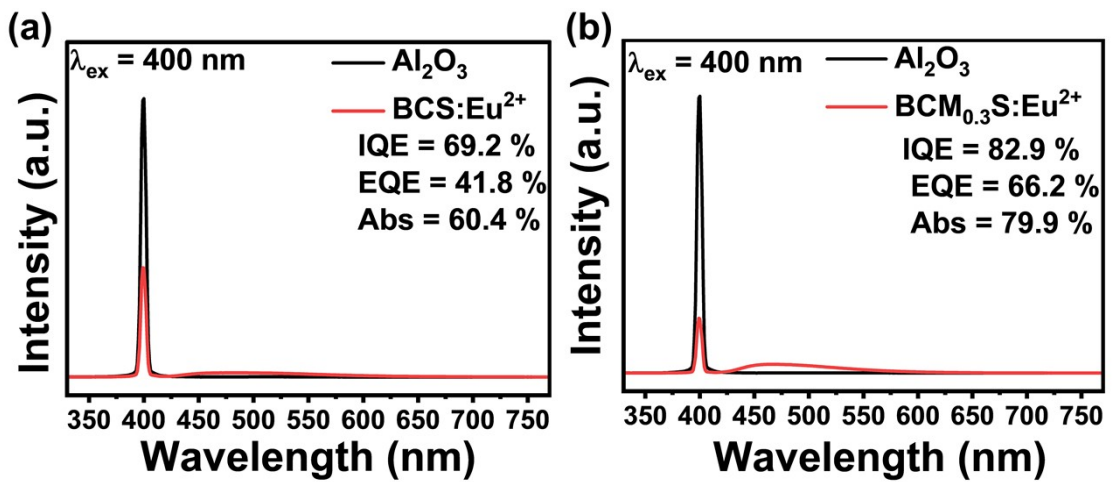

**Figure S4.** Spectra to determine the quantum efficiency of (a) BCS:Eu<sup>2+</sup> and (b) BCM<sub>0.3</sub>S:Eu<sup>2+</sup>.

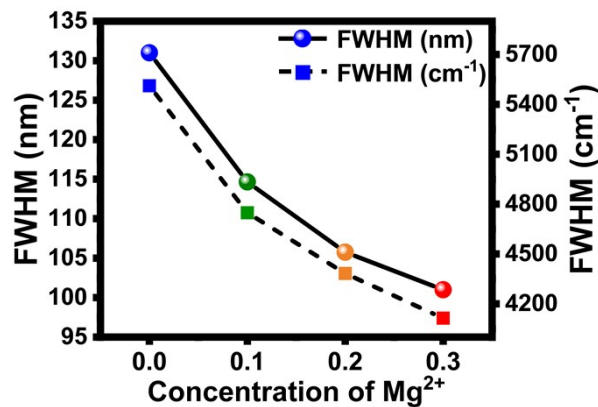

**Figure S5.** Dependence of FWHM on the concentration of Mg<sup>2+</sup> in BCM<sub>x</sub>S:Eu<sup>2+</sup> (x = 0, 0.1, 0.2 and 0.3) samples.

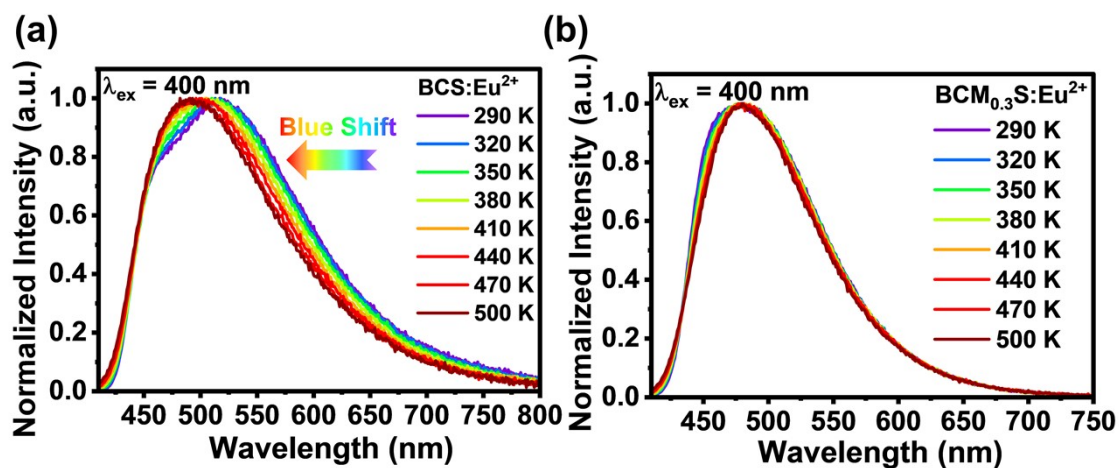

**Figure S6.** Normalized temperature-dependent PL spectra from 290-500 K for (a) BCS:Eu<sup>2+</sup> and (b) BCM<sub>0.3</sub>S:Eu<sup>2+</sup>.
